# Supplementary material
Source: ML conference proceedings conference paper supplement (https://openaccess.thecvf.com/content/cvpr_2017/html/Pei_Temporal_Attention-Gated_Model_2017_CVPR_paper.html)
Supplement: Supplementary file 1 [file Pei_Temporal_Attention-Gated_Model_2017_CVPR_supplemental.pdf]

Archive with 7 entries (4 files):
- 3096/
- 3096/TAGM_final.mp4
- __MACOSX/
- __MACOSX/3096/
- __MACOSX/3096/._TAGM_final.mp4
- 3096/TAGM_supplementary.txt
- __MACOSX/3096/._TAGM_supplementary.txt
