# Supplementary material
Source: ML conference proceedings conference paper supplement (https://openaccess.thecvf.com/content/cvpr_2017/html/Pei_Temporal_Attention-Gated_Model_2017_CVPR_paper.html)
Supplement: Supplementary file 1 [file Pei_Temporal_Attention-Gated_Model_2017_CVPR_supplemental.pdf › 3096/TAGM_supplementary.txt]

This is the supplementary material which is a video containing three complete event sequences mentioned in Figure 7: 
1. File ID: '01Tn0Fvc1bA', event: biking;
2. File ID: 'bfJq9nflCbs', event: birthday;
3. File ID: '5NIGy3JWZiM', event: baseball. 

To shorten the video length, we didn't perform full video for the birthday sample 'bfJq9nflCbs' but keep the representative segment.


The video is in the format 'mp4', which can be opened by most video player. 
